# Supplementary material
Source: ML conference proceedings conference paper supplement (https://proceedings.neurips.cc/paper_files/paper/2019/hash/d60678e8f2ba9c540798ebbde31177e8-Abstract.html)
Supplement: Supplementary file [file d60678e8f2ba9c540798ebbde31177e8-Supplemental.zip]

---

# Supplementary Material: Doubly-Robust Lasso Bandit

---

**Gi-Soo Kim**  
Department of Statistics  
Seoul National University  
gisoo1989@snu.ac.kr

**Myunghee Cho Paik**  
Department of Statistics  
Seoul National University  
myungheechopaik@snu.ac.kr

## A Proof of Lemma 4.2

Since  $\text{regret}(t)$  is not larger than 1 in any case,  $R(T, b) \leq \sum_{t=z_T}^T m_t$ , where  $\{m_t\}_{t=z_T}^T$  is a sequence of independent Bernoulli variables with  $\mathbb{E}[m_t] = \lambda_{1t}$ . By Hoeffding's inequality,

$$\mathbb{P}\left(\sum_{t=z_T}^T m_t - \sum_{t=z_T}^T \lambda_{1t} > a\right) \leq \exp\left(-\frac{2a^2}{T}\right),$$

for any  $a \geq 0$ . Setting  $\exp(-2a^2/T) = \delta$ , we have  $a = \sqrt{T \log(1/\delta)/2}$ . Hence, with probability at least  $1 - \delta$ ,

$$\sum_{t=z_T}^T m_t \leq \sum_{t=z_T}^T \lambda_{1t} + \sqrt{\frac{T}{2} \log\left(\frac{1}{\delta}\right)} \leq \sum_{t=1}^T \lambda_{1t} + \sqrt{\frac{T}{2} \log\left(\frac{1}{\delta}\right)}.$$

Since  $\lambda_{1t} = \lambda_1 \sqrt{\log(dt)/t}$ ,

$$\sum_{t=1}^T \lambda_{1t} = \sum_{t=1}^T \lambda_1 \sqrt{\frac{\log(dt)}{t}} \leq \lambda_1 T \sqrt{\frac{1}{T} \sum_{t=1}^T \frac{\log(dT)}{t}} \leq \lambda_1 \sqrt{T} \sqrt{\log(dT)} \sqrt{1 + \log T},$$

where the first inequality is due to Jensen's inequality and the second is due to  $\sum_{t=1}^T (1/t) \leq 1 + \int_{t=1}^T (1/t) dt = 1 + \log T$ .

## B Proof of Lemma 4.3

Recall that we defined  $z_T = \max\left(\frac{3}{C(\phi_1)^2} \log d, \frac{1}{C(\phi_1)^2} \log\left(\frac{T^2}{\delta'}\right)\right)$  where  $C(\phi_1) = \min(0.5, \frac{\phi_1^2}{256s_0})$ . Due to assumptions A2 and A3 and Corollary 3.4, we have with probability at least  $1 - \delta'$ ,

$$\hat{\Sigma}_t := \frac{1}{t} \sum_{\tau=1}^t \bar{b}(\tau) \bar{b}(\tau)^T \in C\left(\text{supp}(\beta), \frac{\phi_1}{\sqrt{2}}\right) \text{ for all } t \geq z_T, \quad (\text{i})$$

where  $\delta' < \delta$ . It remains to show that when (i) holds, the left-hand side of (8) is smaller than  $(\delta - \delta')/t^2$ . In Section 3.2, we have shown that given the conditioning argument in (8) and the restriction (7) on  $\pi_{a(t)}(t)$ ,  $(\hat{r}(\tau) - \bar{b}(\tau)^T \beta | \mathcal{F}_{\tau-1})$  is  $\tilde{R}$ -sub-Gaussian for all  $\tau = 1, \dots, t$ , with  $\tilde{R} = O(1)$ . Applying Lemma 3.2 with  $(x_\tau, y_\tau) = (\bar{b}(\tau), \hat{r}(\tau))$  for  $\tau = 1, \dots, t$ ,  $\phi = \phi_1/\sqrt{2}$ ,  $R = \tilde{R}$  and  $\delta = (\delta - \delta')/t^2$  completes the proof.

## C Proof of Lemma 4.4

Suppose  $t$  corresponds to subgroup (c-a). Since  $a(t) = \operatorname{argmax}_{1 \leq i \leq N} \{b_i(t)^T \hat{\beta}(t-1)\}$  for this subgroup,

$(b_{a(t)}(t) - b_{a^*(t)}(t))^T \hat{\beta}(t-1) \geq 0$  and

$$\begin{aligned} \text{regret}(t) &\leq \text{regret}(t) + (b_{a(t)}(t) - b_{a^*(t)}(t))^T \hat{\beta}(t-1) \\ &= (b_{a(t)}(t) - b_{a^*(t)}(t))^T (\hat{\beta}(t-1) - \beta) \\ &\leq \|b_{a(t)}(t) - b_{a^*(t)}(t)\|_2 \|\hat{\beta}(t-1) - \beta\|_2 \\ &\leq \|\hat{\beta}(t-1) - \beta\|_2 \\ &\leq \|\hat{\beta}(t-1) - \beta\|_1 \leq d_t, \end{aligned}$$

where the second inequality is due to Cauchy-Schwarz inequality and the third inequality is due to assumption A1. Hence, the sum of regrets from subgroup (c-a) is at most  $\sum_{t=1}^T d_t$ , which we can bound as follows.

$$\begin{aligned} \sum_{t=1}^T d_t &\leq \frac{\sqrt{128}}{\phi_1^2} s_0 \tilde{R} \sqrt{\log\left(\frac{edT^2}{\delta - \delta'}\right)} \sum_{t=1}^T \sqrt{\frac{1}{t}} \\ &\leq \frac{\sqrt{128}}{\phi_1^2} s_0 \tilde{R} \sqrt{\log\left(\frac{edT^2}{\delta - \delta'}\right)} T \sqrt{\frac{1}{T} \sum_{t=1}^T \frac{1}{t}} \leq \frac{\sqrt{128}}{\phi_1^2} s_0 \tilde{R} \sqrt{\log\left(\frac{edT^2}{\delta - \delta'}\right)} \sqrt{T} \sqrt{\log T}. \end{aligned}$$

The derivation is analogous to that of the upper bound of  $\sum_t \lambda_{1t}$  because  $d_t$  and  $\lambda_{1t}$  have the same order in  $t$ . Meanwhile, we proved in Lemma 4.3 that the subgroup (c-b) is empty with probability at least  $1 - \delta$ . Therefore, with probability at least  $1 - \delta$ ,

$$R(T, c) \leq \sum_{t=1}^T d_t \leq \frac{\sqrt{128}}{\phi_1^2} s_0 \tilde{R} \sqrt{\log\left(\frac{edT^2}{\delta - \delta'}\right)} \sqrt{T} \sqrt{\log T}.$$

## D Proof of Theorem 4.1

Let  $R(T, a)$  be the sum of regrets from group (a). Due to  $R(T, a) \leq z_T$ , Lemma 4.2, and Lemma 4.4, we have with probability at least  $1 - 2\delta$ ,

$$\begin{aligned} R(T) &\leq R(T, a) + R(T, b) + R(T, c) \\ &\leq \max\left(\frac{3}{C(\phi_1)^2} \log d, \frac{1}{C(\phi_1)^2} \log\left(\frac{T^2}{\delta'}\right)\right) + \frac{\sqrt{128}}{\phi_1^2} s_0 \tilde{R} \sqrt{T} \log\left(\frac{edT^2}{\delta - \delta'}\right) + \lambda_1 \sqrt{T} \log(dT) \\ &\quad + \sqrt{\frac{T}{2} \log\left(\frac{1}{\delta}\right)} \\ &= O(s_0 \sqrt{T} \log(dT)). \end{aligned}$$
